# Supplementary material for: Changes in glacier equilibrium-line altitude in the western Alps from 1984 to 2010: evaluation by remote sensing and modeling of the morpho-topographic and climate controls
Source: Copernicus journal article supplement (doi:10.5194/tc-7-1455-2013), 2013-09-24
Supplement: Supplementary file [file tc-7-1455-2013-supplement.pdf]

1

**Supplementary material**

2 **Table I:** Characteristics of the 122 satellite images used for SLA measurements. For Landsat images,  
 3 the pixel size is 15 and 30 m for the panchromatic and multispectral modes respectively (LT5 =  
 4 Landsat 5 TM, LE7 = Landsat 7 ETM+). For SPOT images the pixel size is 2.5, 5 or 10 m for the  
 5 panchromatic mode (P) and 10 or 20 m for the multispectral mode (XS) depending on the satellite. For  
 6 ASTER images the pixel size is 15 m.

| Date       | Sensor    | Path-Row                                 | Date       | Sensor    | Path-Row                                 |
|------------|-----------|------------------------------------------|------------|-----------|------------------------------------------|
| 31/08/1984 | LT5       | 196-028 and 196-029                      | 24/08/2001 | SPOT-2 XS | 050-259                                  |
| 09/09/1984 | LT5       | 195-028 and 195-029                      | 29/08/2001 | SPOT-1 XS | 051-257                                  |
| 02/08/1985 | LT5       | 196-028 and 196-029                      | 07/09/2001 | ASTER-1   | 195-029                                  |
| 11/08/1985 | LT5       | 195-028 and 195-029                      | 02/10/2001 | LE7       | 195-028 and 195-029                      |
| 28/09/1985 | LT5       | 195-029                                  | 02/08/2002 | LE7       | 195-029                                  |
| 09/09/1986 | LT5       | 196-028                                  | 18/08/2002 | LE7       | 195-028                                  |
| 05/10/1986 | SPOT 1 P  | 051-258 and 051-259                      | 14/09/2002 | SPOT-5 XS | 051-258                                  |
| 17/10/1986 | LT5       | 195-028                                  | 05/10/2002 | LE7       | 195-028 and 195-029                      |
| 09/09/1987 | LT5       | 196-028                                  | 12/08/2003 | ASTER     | 195-029                                  |
| 18/09/1987 | LT5       | 195-029                                  | 13/08/2003 | LT5       | 195-028 and 195-029                      |
| 27/08/1988 | LT5       | 195-028 and 195-029                      | 22/08/2003 | SPOT-2 P  | 052-259                                  |
| 12/09/1988 | LT4       | 195-028 and 195-029                      | 23/08/2003 | SPOT-5 P  | 051-257 and 051-259                      |
| 26/09/1988 | SPOT-1 XS | 050-259                                  | 21/09/2003 | LT5       | 196-029                                  |
| 30/07/1989 | SPOT-1 P  | 051-259                                  | 14/08/2004 | ASTER     | 195-029                                  |
| 13/08/1989 | LT5       | 195-029                                  | 27/08/2004 | SPOT-5 XS | 051-259                                  |
| 20/09/1989 | SPOT-1 P  | 052-257 and 052-258                      | 08/09/2004 | LE7       | 195-028 and 195-029                      |
| 01/09/1990 | SPOT-2 XS | 051-259                                  | 08/09/2004 | ASTER     | 195-028 and 195-029                      |
| 10/09/1990 | LT5       | 195-028                                  | 01/08/2005 | ASTER     | 195-027 and 195-028                      |
| 19/08/1991 | LT5       | 196-029                                  | 10/08/2005 | LE7       | 195-028                                  |
| 25/08/1991 | SPOT-2 P  | 052-257                                  | 02/09/2005 | LE7       | 196-028 and 196-029                      |
| 30/08/1991 | SPOT-2 P  | 051-258 and 051-259                      | 05/09/2006 | LE7       | 196-028 and 196-029                      |
| 05/08/1992 | LT5       | 196-028                                  | 21/09/2006 | LE7       | 196-028 and 196-029                      |
| 17/09/1992 | SPOT-1 XS | 051-259                                  | 16/10/2006 | LE7       | 195-028 and 195-029                      |
| 21/09/1992 | SPOT-1 XS | 051-257 and 051-258                      | 31/07/2007 | LE7       | 195-028 and 195-029                      |
| 26 07 1993 | SPOT-1 XS | 050-259                                  | 24/09/2007 | LE7       | 196-028 and 196-029                      |
| 02 09 1993 | SPOT-2 XS | 051-257                                  | 19/10/2007 | LE7       | 195-029                                  |
| 09/08/1994 | SPOT-3 P  | 052-257 and 051-259                      | 19/10/2007 | ASTER     | 196-028 and 196-029                      |
| 15/08/1994 | SPOT-3 P  | 050-259 and 052-259                      | 18/08/2008 | LE7       | 195-028 and 195-029                      |
| 31/08/1995 | SPOT-2 XS | 051-259                                  | 02/09/2008 | SPOT 5 XS | 051-257, 052-258,<br>052-259 and 051-260 |
| 31/07/1996 | SPOT-3 P  | 052-259                                  | 07/09/2008 | SPOT 4 XS | 051-259                                  |
| 08/08/1996 | SPOT-2 XS | 051-257                                  | 15/08/2009 | SPOT-5 XS | 052-257 and 052-258                      |
| 30/09/1997 | SPOT-1 XS | 051-257, 051-258,<br>051-259 and 051-260 | 06/09/2009 | LE7       | 195-029                                  |
| 26/08/1998 | SPOT-4 XS | 052-257                                  | 22/09/2009 | LE7       | 195-028 and 195-029                      |
| 30/08/1998 | SPOT-4 XS | 051-259 and 052-258                      | 29/09/2009 | LE7       | 196-029                                  |
| 02/09/1999 | LE7       | 196-029                                  | 30/09/2009 | LT5       | 195-028                                  |
| 11/09/1999 | LE7       | 195-028 and 195-029                      | 31/08/2010 | LE7       | 196-028 and 196-029                      |
| 12/08/2000 | LE7       | 195-028                                  | 09/09/2010 | LE7       | 195-029                                  |
| 26/08/2000 | SPOT-1 XS | 051-257                                  | 15/09/2010 | SPOT-5 XS | 052-258                                  |
| 28/08/2000 | LE7       | 195-029                                  | 16/09/2010 | ASTER     | 195-027, 195-028 and<br>195-029          |
|            |           |                                          | 23/09/2010 | SPOT-4 XS | 050-259                                  |

7
